# Supplementary material for: Prognostic Value of Presepsin, Proadrenomedullin and Interleukin-6 in Sepsis: A Prospective Study From the Emergency Department
Source: Research Square preprint supplement (doi:10.21203/rs.3.rs-6691861/v1), 2025-06-24
Supplement: Supplementary file 1 [file a3b3d7f03e45d00fe632a67d.docx]

**1. Seyit Ali Karagöz; MD1Corresponding Author**

ORCID: 0009-0009-9497-1142 email: [mdseyitkaragz@gmail.com](mailto:mdseyitkaragz@gmail.com)

**2. Yonca Senem Akdeniz; MD1**

ORCID: 0000-0002-4843-1155 email:[ysakdeniz@iuc.edu.tr](mailto:ysakdeniz@iuc.edu.tr)

**3. Dildar Konukoğlu; Prof.2**

ORCID: 0000-0002-6095-264X email: [dkonuk@iuc.edu.tr](mailto:dkonuk@iuc.edu.tr)

**4. Sevil Kuşku Kıyak; MD1**

ORCID: 0000-0001-9414-0300email: [drsevilkusku@gmail.com](mailto:drsevilkusku@gmail.com)

**5. Serap Biberoğlu; Assoc. Prof.1**

ORCID: 0000-0003-4709-3315 email: [serap.biberoglu@iuc.edu.tr](mailto:serap.biberoglu@iuc.edu.tr)

**6. Afşın İpekci; Assoc. Prof.1**

ORCID: 0000-0001-6125-4061email: [afsin.ipekci@iuc.edu.tr](mailto:afsin.ipekci@iuc.edu.tr)

**7. Fatih Çakmak; Assoc. Prof.1**

ORCID: 0000-0002-8813-4139 email: [fatih.cakmak@iuc.edu.tr](mailto:fatih.cakmak@iuc.edu.tr)

**8. Alp Batuhan Öztürk; MD.1**

ORCID: 0009-0000-0584-5131 email: [alpbatuhanoz@gmail.com](mailto:alpbatuhanoz@gmail.com)

**9. İbrahim İkizceli; Prof.1**

ORCID: 0000-0002-9825-4716 email: [ikizceli@iuc.edu.tr](mailto:ikizceli@iuc.edu.tr)

10. **Seda Özkan; Prof. 1**

ORCID: 0000-0003-1835-8820 email: [seda.ozkan@iuc.edu.tr](mailto:seda.ozkan@iuc.edu.tr)

1. Istanbul University-Cerrahpasa, Cerrahpasa Faculty of Medicine, Department of

Emergency Medicine, Istanbul, Turkey.

2. Istanbul University-Cerrahpasa, Cerrahpasa Faculty of Medicine, Department of

Medical Biochemistry, Istanbul, Turkey.
